1 **Individual, organisational and system capacities, and the functioning**  
2 **of a multi-country implementation-focused network for maternal,**  
3 **newborn and child health: Bangladesh, Ethiopia, Malawi, and**  
4 **Uganda.**

5 **Authors:** Anene Tesfa<sup>1\*</sup>, Catherine Nakidde<sup>2</sup>, Kohenour Akter<sup>3</sup>, Fatama Khatun<sup>3</sup>, Kondwani  
6 Mwandira<sup>4</sup>, Seblewengel Lemma<sup>5</sup>, Gloria Seruwagi<sup>2</sup>, Kasonde Mwaba<sup>6</sup>, Mike English<sup>7</sup>, Callie  
7 Daniels-Howell<sup>6</sup>, QCN Evaluation Group, Nehla Djellouli<sup>6</sup>, Tim Colbourn<sup>6</sup>, Tanya Marchant<sup>5</sup>

8

9 <sup>1</sup> Ethiopian Public Health Institute, Addis Ababa, Ethiopia

10 <sup>2</sup> School of Public Health, Makerere University, Kampala, Uganda

11 <sup>3</sup> Perinatal Care Project, Diabetic Association of Bangladesh, Dhaka, Bangladesh

12 <sup>4</sup>Parent and Child Health Initiative PACHI, Lilongwe, Malawi

13 <sup>5</sup>Department of Disease Control, London School of Hygiene & Tropical Medicine, London, UK

14 <sup>6</sup>Institute for Global Health, University College, London, UK

15 <sup>7</sup> Centre for Tropical Medicine and Global Health, University of Oxford, Oxford, UK

16

17 \*Corresponding author

18 Email: [anenesfa@gmail.com](mailto:anenesfa@gmail.com) (AT)

19 Addis Ababa, Ethiopia

20

21

**NOTE: This preprint reports new research that has not been certified by peer review and should not be used to guide clinical practice.**

## 22 **Abstract**

23 Better policies, investments, and programs are needed to improve the integration and quality  
24 of maternal, newborn, and child health services. Previously, partnerships and collaborations  
25 that involved multiple countries with a unified aim have been observed to yield positive  
26 results. Since 2017, the WHO and partners have hosted the Quality of Care Network [QCN], a  
27 multi-country implementation network focused on improving maternal, neonatal, and child  
28 health care. In this paper we examine the functionality of QCN in different contexts. We focus  
29 on implementation capacities and contexts in four network countries: Bangladesh, Ethiopia,  
30 Malawi, and Uganda. In each country, the study was conducted over several consecutive  
31 rounds between 2019-2022, employing 227 key informant interviews with major  
32 stakeholders and members of the network countries, and 42 facility observations. The  
33 collected data were coded using Nvivo-12 software and categorized thematically. The study  
34 showed that individual, organizational and system-level capacities, and circumstances all  
35 played an important role in shaping implementation success in network countries, but that  
36 these levels were inter-linked. Across all levels, systems that enabled leadership, motivated  
37 and trained staff, and created a positive culture of data use were critical – from the policy  
38 making arena including addressing financing issues - to the day-to-day practice improvement  
39 at the front line. Some characteristics of QCN actively supported these levels, for example  
40 shared learning forums for continuous learning, a focus on data and tracking progress, and  
41 emphasising the importance of coordinated efforts towards a common goal. However,  
42 inadequate system financing and capacity also hampered network functioning, especially in  
43 the face of external shocks.

44 **Key words:** capacities, multi-county network, quality of care, maternal and newborn health,  
45 Bangladesh, Ethiopia, Malawi, Uganda

46

## 47 **Introduction**

48 Despite advances in maternal and newborn survival rates in low and middle-income  
49 countries, most deaths are attributed to weak health systems and poor quality maternal and  
50 newborn healthcare services [1]. Many maternal and newborn deaths are preventable if all  
51 women have access to quality care during and after childbirth and measures taken to support  
52 maternal health will also positively influence newborn health [2,3].

53 Lessons learnt from previous efforts to improve maternal, newborn and child healthcare such  
54 as improvement in coverage and quality of services have pointed to the need for integrated,  
55 comprehensive, and holistic approaches and systems that promote an enabling environment  
56 to produce a tangible result. Such environments are influenced by a combination of the  
57 circumstances of individuals, organizations, and systems so that quality services with the  
58 requisite staffing and equipment are supported by local problem-solving initiatives and  
59 coherent policies [4-6]. For example, the current recommendation for all births to be assisted  
60 by skilled professionals who provide care with knowledge, problem-solving attitudes and  
61 compassion is important but not sufficient to save lives as these individuals also require an  
62 appropriate environment to practice in [7,8]. Therefore, at the organizational level,  
63 foundations such as the availability of basic amenities and adequate equipment and staff,  
64 favourable rules, and regulations as well as a supportive management system are needed to  
65 stimulate the implementation of interventions aimed at improving health [9]. And both  
66 individual and organizational performance requires system support [10].

67 One such initiative designed to take a holistic approach to service improvement is the network  
68 for improving Quality of Care for Maternal, Newborn and Child Health [QCN], a multi-country  
69 implementation and learning network focusing on maternal, newborn and child health care  
70 improvements, hosted by the World Health Organisation (WHO) since 2017 [11]. In 2017, the  
71 WHO and global partners launched QCN, with the partnership of ten pathfinder network  
72 countries: Bangladesh, Cote d'Ivoire, Ethiopia, Ghana, India, Malawi, Nigeria, Sierra Leone,  
73 the United Republic of Tanzania and Uganda. Kenya joined the network as the 11th country  
74 in 2019.

75 The launch of QCN presented an opportunity to learn lessons about this multi-country  
76 network strategy and implementation process for maternal and newborn health care quality  
77 improvement. This paper is part of a collection looking at different aspects of the emergence,  
78 legitimacy, and effectiveness of the network (S1 Text). Here, we report on the capacities of  
79 individuals, organizations, and systems that enabled or impeded the network's functionality  
80 examining the implementation context in four of the network countries, Bangladesh,  
81 Ethiopia, Malawi, and Uganda.

82

## 83 **Methods**

84 Our research provides the implementation perspective of these four network countries (S2  
85 Text). The study teams in these countries used a mixed-method approach to collect data from  
86 the national and subnational level network members, including at the health facility level, for  
87 the overall evaluation. Data from qualitative interviews and facility observations are analysed  
88 and presented in this paper (Table 1).

89 **Table 1: QCN interviews and observations completed**

| Case-study country | Data collection round (dates) | National interviews (n) | Local interviews (n) | Facility observation (n) |
|--------------------|-------------------------------|-------------------------|----------------------|--------------------------|
| Bangladesh         | 1 (Oct 2019 – Mar 2020)       | 13                      | 07                   | 3                        |
|                    | 2 (Oct 2020 – Jan 2021)       | 14                      | 11                   | 4                        |
|                    | 3 (May 2021 - Sep 2021)       | 10                      | 12                   | 4                        |
|                    | 4 (Jan 2022 - Mar 2022)       | 08                      | 00                   | 00                       |
| Ethiopia           | 1 (Jan 2021– Mar 2021)        | 08                      | 11                   | 4                        |
|                    | 2 (Nov 2021- Dec 2021)        | 10                      | 11                   | 3                        |
| Malawi             | 1 (Oct 2019 – Mar 2020)       | 07                      | 12                   | 4                        |
|                    | 2 (Nov 2020– Jan 2021)        | 10                      | 07                   | 4                        |
|                    | 3 (Aug 2021 – Nov 2021)       | 9                       | 7                    | 4                        |
|                    | 4 (Mar 2022)                  | 2                       | 3                    | 00                       |
| Uganda             | 1 (Nov 2020 – Mar 2021)       | 07                      | 13                   | 4                        |
|                    | 2 (Jun 2021 – Sep 2021)       | 12                      | 08                   | 4                        |
|                    | 3 (Feb 2022 – March- 2022)    | 10                      | 05                   | 4                        |

90

91 We conducted semi-structured interviews with national level and sub-national level network  
 92 members and key stakeholders in Bangladesh, Ethiopia, Malawi, and Uganda. Participants  
 93 included employees of government bodies, implementing and technical partners as well as  
 94 health facility workers in the implementation districts. A topic guide was centrally prepared  
 95 then translated to local languages (S2 Text) where appropriate and piloted in each country.

96 As a result, minor adaptations were made to reflect country contexts. In each country we  
97 conducted several rounds of interviews, at least six months apart, to capture changes in how  
98 the network was operating and views pertaining to network activities as well as follow-up on  
99 emerging findings from the previous round. Following the first round of data collection, topic  
100 guides were refined in subsequent rounds specifically for each country and category of  
101 stakeholders.

102 Facility observations were conducted in purposefully selected best and least well performing  
103 facilities in each country. These facilities were selected in conversation with network leaders  
104 in each country and based on health outcome data such as a comparison of maternal and  
105 child mortality indicators [available from national databases] and other quality of care data  
106 [e.g., those used in national schemes]. During observations, we used a common template to  
107 capture key processes relevant to the focus of the network in each country and recorded  
108 unstructured notes about health care processes on the day. Mothers coming to the facility  
109 were observed during service provision. Further details on our methods are provided in S2  
110 Text.

111 Data were entered into Nvivo-12 software for analysis and all countries used a common  
112 codebook developed by the senior members of the QCN evaluation group, that was then  
113 iteratively refined to accommodate country-specific context (S2 text). We used a framework  
114 analysis for the purpose of writing this paper, informed by a conceptual framework for  
115 understanding policy competences and capabilities (figure 1) [12].

116

117 **Fig 1. Conceptual framework on policy competencies and capabilities, adapted from Wu**  
118 **et. al [12].**

119

## 120 **Ethical considerations**

121 All interviews and observations were conducted by local team members after obtaining  
122 informed, formal written consent, including separate written consent for tape recording.

123 Patients' privacy was respected during hospital observations. All data are confidential and  
124 anonymised. Ethical approval was obtained from the Research Ethics Committee at University  
125 College London (3433/003) and institutional review boards in Bangladesh (BADAS-  
126 ERC/EC/19/00274), Ethiopia (EPHI-IRB-240-2020), Malawi (NHSRC Ref,19/03/2264) and  
127 Uganda (MUSPHDRC, Ref: 869).

128

129

130

131

132

133

134

135

136

137

138

139

140

141

142

## 143 **Results**

144 Here we present findings on ways in which individual, organizational and system  
145 circumstances influenced the functionality of QCN at the national level, highlighting common  
146 themes to emerge across the four network countries.

147

### 148 **Individual circumstances**

149 Three key themes emerged under individual circumstances: [i] the need to retain trained and  
150 motivated staff, and the frustration experienced when this was suboptimal; [ii] enhancing a  
151 culture of documentation and data use; and [iii] the importance of leaders to motivate  
152 individuals.

#### 153 **i. The need to retain trained and motivated staff**

154 QCN was perceived to have improved the availability of skilled professionals in enrolled  
155 facilities. This is both by increasing the number of staff and improving the skills of the existing  
156 ones. Bangladesh is one of the countries making progress in consistently providing health care  
157 with the assistance of trained professionals. However, participants reported on-going  
158 challenges and frustrations in retaining quality improvement trained and motivated staff. In  
159 Bangladesh while facilities were striving to provide full-time skilled care, it was noted that not  
160 all staff provided an equally high-quality service and high demand negatively affected staff  
161 motivation.

162

163 *“Clinical standards are not uniformly applied by all providers; there are insufficient*  
164 *training and decision aids; there are long patient waiting times and improper queue*



165 *management and a large staff workload has resulted in challenges with maintaining*  
166 *staff motivation.” [QCN webinar-Global level-Bangladesh Round 1]*

167 Newly qualified and fresh staff joining the health system in Ethiopia and Uganda were thought  
168 to contribute to a lack of saturation of quality improvement (QI) knowledge and skills. And  
169 this QI skill gap was exacerbated by high levels of staff attrition, affecting the institutional  
170 memory for network functioning. In Malawi, retention of skilled staff was a significant  
171 challenge as well, partly due to a pre-existing ministry of health policy in place that rotates  
172 health care workers between departments and/or health facilities, thereby disrupting  
173 institutional memory about QI and network activities.

174 *“Staff turnover due to rotation to other departments/facilities affects the quality of*  
175 *Care as health workers trained to provide MNH services are moved out and incoming*  
176 *health workers may not have the necessary skills. This also directly affects QCN*  
177 *implementation as sometimes the staff who are shifted are trained WIT [Work*  
178 *Improvement Team] members.” [Facility observation-Case 3-Malawi Round 2]*

179 One of the assumptions of the network was that knowledge and learning would be shared  
180 among network member health professionals and periodic learning forums were organized  
181 for this purpose. Staff attending these forums were eligible for an allowance to cover any  
182 expenses and respondents commented that competition among staff occasionally got in the  
183 way of knowledge sharing, partly because of those compensations. This was found to be an  
184 emergent property of the QCN implementation that has negative consequences.

185 *“... remember these health workers in maternity, antenatal and the child clinics all*  
186 *work in shifts. So, I am going to pick nurse A and leave out nurse B in the hope that*  
187 *nurse A will come and tell nurse B what is supposed to be done. They actually don't*

188 *even share. The health workers are saying that those who go are getting paid*  
189 *allowances and when they come back, even if they wanted to share, others are really*  
190 *annoyed that they are not selected.” [Technical Partner-National level-Uganda Round*  
191 *1]*

192

193 **ii. Enhancing the culture of documentation and data use**

194 A strong theme to emerge across the four countries was that a critical achievement of the  
195 network to enhance health care professional’s documentation culture, aligning with a core  
196 network objective to reduce maternal and newborn mortality through use of easily  
197 retrievable, local data. As explained by a midwife in Ethiopia:

198 *“... If you don’t record the number of mothers you assisted, you don’t know how many*  
199 *deliveries you have attended. This system has helped me and fellow midwives to*  
200 *improve our documentation culture...” [Health Facility Worker-Local level-Ethiopia*  
201 *Round 1]*

202 Network countries put renewed emphasis on training for reporting systems as well as learning  
203 from identified problems. This was explained to be a major component of capability for QI in  
204 Bangladesh where there was a focus on introducing updated data systems and training  
205 hospital staff to use them.

206 *“The data from different sectors come to the statistician and the statistician updates*  
207 *the database. We couldn’t do this thing before. Now the sisters [nurses] have been*  
208 *motivated to do these after arranging training and doing many things.” [Implementing*  
209 *partner-National level-Bangladesh Round 1]*

210 Despite improvements, actors working at different levels in the system reported that poor  
211 documentation practices, poor quality of data collected, lack of data collection tools, lack of  
212 knowledge on how to use them, and lack of a culture of data use for decision making  
213 continued to be a challenge across the network. In Uganda there were complaints that the  
214 ministry of health monitoring tool was not easy to use due to its bulkiness and requiring extra  
215 time of providers who are already overburdened, resulting in implementing partners using  
216 their own tools: this duplication negatively affected motivation around data use. Numerous  
217 respondents in Ethiopia and Malawi reported that their DHIS-2 reports remained incomplete,  
218 and mistakes were frequently found despite improvements in report quality. A respondent at  
219 one of the health facilities in Malawi elaborated this as follows,

220 *“There are data issues, missing data, poor quality data and lack of ownership for the*  
221 *data. People in the facilities should sit down to look at their data... they should ask ‘Is*  
222 *it making sense to us? What are the problems?’ So, there is a lot of work out there to*  
223 *improve.” [Government-National level-Malawi Round 2]*

224

### 225 **iii. The importance of leaders to motivate individuals**

226 Strong leadership was cited as playing an instrumental role in supporting individuals to  
227 contribute positively to QCN across the network countries. The active participation of leaders  
228 at all levels brought attention to the importance of quality of care, motivating health staff and  
229 communities alike.

230 *“.....About leadership, when the Civil Surgeon puts a focus on, that facility will*  
231 *undoubtedly perform well. The reason for this is that no matter what you want to do,*

232 *good institutional leadership is critical.” [Implementing partner-National level-*  
233 *Bangladesh Round 4]*

234 However, respondents across the countries indicated that leadership and accountability  
235 lacked uniformity between different levels of the network, with different patterns by country.  
236 In Ethiopia the network members’ engagement seemed strong at the top and most  
237 peripheries; in Uganda QCN seemed more cohesive at the national level compared to the  
238 subnational level; in Malawi, network leadership was more robust at the top level. Different  
239 levels in Bangladesh showed varied leadership commitment. All countries shared that the  
240 continuous reshuffling of leaders negatively affected engagement. Lack of QI knowledge  
241 among individuals in leadership positions within health facilities was also cited as a challenge.

242 *“Leadership is also an issue in most hard-to-reach facilities. They have people who are*  
243 *just coming from school, they don’t have the experience on management...So*  
244 *somehow, you will find that the leadership to be weak and they don’t even grasp the*  
245 *concept of quality. So, for them to support the QI initiative is a challenge. Once the*  
246 *leadership is weak or not conversant on some of the QI initiatives, you will find that we*  
247 *don’t manage our facilities the way we would want.” [Government-National level-*  
248 *Malawi Round 3]*

## 249 **2. Organizational circumstances**

250 Three themes emerged under organisational circumstances [i] inadequate staffing levels; [ii]  
251 the need to find strategies for continuously building staff skills; and [iii] the problem of limited  
252 physical resources and processes in facilities.

### 253 **i. Inadequate staffing levels**

254 Numerous respondents across the four countries said that the inadequate number of  
255 healthcare personnel reduced the ability of a facility to engage with QCN effectively. The  
256 problem also extended to support staff such as cleaners. This often led to staff performing  
257 ‘double duties’, unsanitary conditions, and health care users experiencing long waiting times.  
258 For example, findings from an observation in one of the case study sites in Uganda indicated  
259 that there was a 1:>50 ratio of provider to patients and, there a 1:12 ratio of providers to beds  
260 in the maternity ward. Despite this, some institutions reported success in establishing targets  
261 for an adequate number of healthcare personnel by recruiting staff especially in districts.

262 *“We have an indicator called ‘approved posts filled with qualified people’. This one*  
263 *has improved really for us. Now we are at 74% .... of course, we cannot avoid the*  
264 *shortages all in all, but I think there is a lot of improvement in the wage bill and*  
265 *recruitment of staff especially in districts.” [Government-National level-Uganda Round*  
266 *2]*

267 Of concern, nepotism emerged as a challenge mentioned for lack of adequate and skilled  
268 professionals in some cases. There were reports of managerial positions and project related  
269 work with extra incentives and benefits being monopolized by a small group of people in an  
270 institution.

271 *“Our current situation is serious. Academic competence is given less attention and*  
272 *people are assigned by race and tribe. They form secret networks and influence the*  
273 *entire institution. Since the leader is not competent enough, he will assign one or two*  
274 *people to support him in every aspect. These people will be assigned to 5-6 programs*  
275 *each. When these people are gone, everything is lost.” [Government-Regional level-*  
276 *Ethiopia Round 2]*

277

278        **ii.        Finding strategies to continuously build staff skills**

279        QCN actors commented on opportunities for building skills of current staff that need either  
280        new training or refresher training on a continuous basis. Examples were provided at multiple  
281        levels: coaching within supportive supervision, mentoring between facilities, skills building in  
282        clusters of facilities, and having visual posters or banners in facilities that show processes. In  
283        addition, institutional collaboration with different universities and professional associations  
284        was described as a good opportunity for support of staff capacity in facilities in Bangladesh  
285        and Uganda. Respondents across the countries agreed on the importance of network  
286        activities that brought staff together to support continuous capacity building. A local level  
287        respondent from Malawi explained,

288                *"We have Continuous Professional Development (CPD) sessions where we invite key*  
289                *players in MNH activities in these 8 facilities where we discuss common conditions that*  
290                *we think need more knowledge and skills so that we will be able to improve the quality*  
291                *of services that we are giving to our patients." [Health facility worker-Local level -*  
292                *Malawi Round 1]*

293        Building from previously existing initiatives and programs of country health systems were also  
294        identified to be important. Participants acknowledged the complementarity of these  
295        programs with QCN.

296                *"QI initiatives by the MoH are already in the system. We have these... learning districts*  
297                *that report regularly is the new thing the network brought. So, the programs complement*  
298                *one another.... Now hospitals support health centers." [Government-Regional level-*  
299                *Ethiopia Round 1]*

300

301 **iii. Limited physical resources and processes in facilities**

302 Lack of physical resources – infrastructure, basic amenities, and equipment - was frequently  
303 mentioned to prevent adequate care, or to harm patient satisfaction. Providers reported that  
304 this problem had tied their hands to exercise the skills and knowledge they acquired through  
305 various trainings.

306 *“The implementing partners have done a lot of training on quality of care however on*  
307 *many occasions, health workers are not able to utilise this acquired knowledge due to*  
308 *lack of essential equipment/resources.” [Government-National level-Uganda Round 2]*

309 One respondent from Bangladesh explained how the combination of shortages in staff and  
310 resources limited the potential for quality improvement:

311 *“So, what is the reason behind this high maternal mortality? The reason is quality has*  
312 *been compromised. You want to increase the delivery rate of the hospitals without the*  
313 *quality improvement? You need the capacity, manpower, system design and different*  
314 *tools. One of my staff reported to me that ‘Sir, I have two death cases of PPH’. I told*  
315 *him to ‘Investigate it.’ He came back after 30 minutes. It was found that the waiting*  
316 *time for those two PPH patients was more than 2 hours.” [Technical Partner-National*  
317 *level-Bangladesh Round 1]*

318 Despite the challenge of physical resources, some improvements in processes were noted due  
319 to QI interventions, for example maternal and perinatal death, surveillance and response  
320 [MPDSR] and death audits in member countries were reported to have been strengthened as  
321 a result of QCN.

322 *“The audits are conducted more frequently, and the quality of data has improved.”*  
323 *[Government-Local-Malawi Round 1]*

### 324 **3. System circumstances**

325 Four themes emerged under system circumstances: [i] the opportunity of policy alignment  
326 and partner coordination; [ii] the burden of parallel reporting systems; [iii] paying for quality  
327 health care; and finally [iv] managing disruptive events.

328

#### 329 **i. Policy alignment and partner coordination**

330 QCN was frequently commented to align well with government policy and rhetoric and to  
331 promote partner alignment. QCN purposively identified and engaged NGOs that work on QI  
332 areas and quality was where these organizations interface. Respondents considered that  
333 government leadership for QCN had been strong in all of the four network countries. It was a  
334 slow start in Uganda but later on picked up with the re-structuring of the ministry of health.  
335 In Ethiopia, the programme was considered a flagship initiative and there was effective  
336 partner coordination. A respondent explained:

337 *“The ministry is taking this initiative as a flagship initiative and in fact, other new*  
338 *learning initiatives are replicating this approach. So, this is an overall mobilization from*  
339 *top to bottom level. Most importantly, I believe it is because of the network that the*  
340 *partner organizations are able to implement the national strategy MNH quality of care*  
341 *road map according to the governmental recommendation and in a harmonized*  
342 *approach.” [Implementing partner-National level-Ethiopia Round 1]*

343 By the same token, MNH was a priority area for the Malawian government and the goals of  
344 the QCN align with national priorities which facilitated uptake of QCN.



345 *" Issues of maternal and newborn health are a priority for Malawi. So, any opportunity*  
346 *that comes, that is geared towards quality services, Malawi is very much interested in*  
347 *that. So, when this network came, it was structured to ministry of health to buy it.*  
348 *Initially it was WHO to talk about the quality of care network. And Malawi got*  
349 *interested and wanted to be one of the countries to get the network."* [Government-  
350 *National level-Malawi Round 2]*

351 **ii. The burden of parallel reporting systems**

352 Parallel reporting systems were identified as a challenge to continuous, timely and quality  
353 data across the countries. One consequence observed in Ethiopia was that implementers  
354 were selective in the indicators they engaged with. Indicators related to maternal mortality  
355 rate, neonatal mortality rate and stillbirth became their focus areas. Likewise, respondents  
356 also mentioned that the indicator "experience of care" was difficult to collect as it required  
357 interviews with service users. Similarly, not every public facility in Bangladesh was using the  
358 full set of QCN indicators. As an implementing partner respondent from Bangladesh  
359 explained, the rollout of quality of care indicators required a high level of complexity:

360 *"...But what we could not do still now is bringing the data under national system,*  
361 *neither at DHIS2 nor Director General of Management Information System."*  
362 *[Implementing partner-National-Bangladesh Round 2].*

363 Respondents also commented that the parallel reporting system and the documentation  
364 process were burdens for health care providers.

365 *"This is a very good tool that was developed in partnership with the MoH, partners,*  
366 *even in consultation with the other offices not only in Malawi. And good results came*  
367 *out but in some places it's too cumbersome for the health unit to complete. But it*

368            *provides a good baseline and a good tool to monitoring progress." [Technical Partner-*  
369            *National-Malawi Round 3]*

370    However, regardless of the challenges, some partners had worked successfully with local  
371    governments to align the national data systems.

372            *"Numerous implementing and monitoring stakeholders, notably UNICEF, Save the*  
373            *Children, and QIS, have worked to include QCN indicators in the formal chain of quality*  
374            *data reporting." [Health facility worker-Local level-Bangladesh Round 2]*

375

376            **iii.    Paying for quality healthcare**

377    Network countries that made maternal and newborn health a pillar of the health system  
378    commented on the importance of financing care. Free maternal and newborn health services,  
379    as was the case in Ethiopia, Malawi and Uganda were thought crucial. In the same vein, the  
380    result-based financing programme in Uganda was thought to have had a positive impact not  
381    only on increased uptake of institutional delivery, but also through improved birth and death  
382    registration, motivation of health workers, and enabling facilities to buy supplies.

383    Nonetheless, all countries reported that direct or indirect health care costs borne by the user  
384    were a barrier to achieving network goals, with some costs preventing patients from receiving  
385    all of the recommended care. This may include having to pay extra for certain tests, like  
386    ultrasound, blood testing, or urinalysis, or having to pay for transportation to a physically  
387    distant district hospital.

388            **iv.    Managing disruptive events**

389    All network countries reported the challenge of staying focused on quality improvement in  
390    the face of disruptive events. The Covid-19 pandemic had created considerable challenge to

391 health care systems everywhere. Immediate QCN implementation was affected, as were  
392 plans for future scale-up. Budgets previously designated for other health care provisions were  
393 repurposed to Covid-19 emergency operation centers, according to respondents. Members  
394 of the subnational network also mentioned the discrepancy in the frequency and intensity of  
395 monitoring and supervision activities.

396 *“Of course, at that time because of the fear, things weren’t clear. Even, people also*  
397 *said ‘all the money to COVID’. Some of the facilities decided to take the QM [Quality*  
398 *management] money to COVID. So, there were those situations in which money was*  
399 *channelled to the COVID activities instead of the routine things.” [Government-*  
400 *National level-Malawi Round 2]*

401 But the Covid-19 pandemic was not the only systems challenge reported. The national  
402 election of Uganda was said to have temporarily disrupted network operations. And the  
403 unstable political situation in Ethiopia was reported to have had an impact on both the site  
404 selection and implementation of the project. Five of the nine implementation regions  
405 encountered sporadic conflicts during the implementation process. During those occasions,  
406 health-care workers were repurposed for emergency tasks, facilities were demolished, and  
407 implementers were unable to obtain complete data.

408

## 409 **Discussion**

410 We examined the capacities and functionality of the Quality of Care Network in four network  
411 countries, reflecting on challenges and facilitators at three levels: individual, organizational  
412 and system. Three core themes emerged that operated across these levels: [i] the need for  
413 high quality staff who were trained, retained and continuously motivated; [ii] avoiding parallel

414 data systems and promoting a culture of local data use; and [iii] leadership at multiple levels  
415 to motivate individuals but also to drive system policy and coordinate partner actions. In  
416 addition, having access to adequate physical resources, financing health care, and managing  
417 disruptive events all emerged as key drivers to network functionality.

418 Individual level contributions in the network activities were found to be the backbone of  
419 successful network implementation but it repeatedly emerged that the individual level must  
420 have the support of organisations and systems. The baseline skill of available health care  
421 workers and their commitment to providing quality services, as reported in other settings,  
422 were crucial [13]. As the world's public health focus has expanded to incorporate quality of  
423 care, the scarcity of qualified health care providers to carry out quality improvement  
424 operations is a major concern [2, 14].

425 Beyond the availability of skilled personnel to conduct health care was the need for  
426 operations that provided continuous on-the-job training. QCN activities directly contributed  
427 to this need through refresher training and learning forum initiatives that brought actors  
428 together for shared learning [15]. The attention that the network placed on tracking progress  
429 at the facility level also supported ongoing ambitions to improve data recording and data use,  
430 although it was not always possible to avoid duplication. These initiatives were seen to fill  
431 gaps that country education systems were not able to address through on-the-job training.  
432 Lessons drawn from the four countries indicated that the knowledge and skills obtained  
433 through continuous learning opportunities also contributed to address the problem of staff  
434 retention by reducing attrition of staff and increasing institutional memory.

435 Failure to develop effective leadership minimizes the chances of a high-quality work  
436 environment, which leads to adverse patient outcomes. Transformational and resonant  
437 leadership styles are linked to decreased patient mortality, whereas relational and task-

438 oriented leadership styles are linked to improved patient satisfaction [16]. A similar case study  
439 which compared rural resource limited facilities of South Africa indicated facilities with  
440 authoritarian leadership style had poor maternal outcomes, less staff motivation and poor  
441 client satisfaction, though this might not work all the time [17]. Other literature also indicates  
442 that a mix of the different leadership styles that consider organizational contexts could bring  
443 the desired effects [18]. The importance of good leadership at different levels to improve  
444 implementation was clearly seen in the four selected countries, but it was a limitation of the  
445 network functioning that leadership and power were not equally distributed at national and  
446 sub-national levels. Beyond direct implementation, political leadership, and commitment to  
447 smooth and successful implementation of programs was also key. Partner and government  
448 alignment and coalition were crucial to the functioning of QCN in all the four countries [19].  
449 Adequate financing of essential health services is crucial [20]. A bottleneck analysis applied in  
450 12 countries in Africa and Asia indicated that health care financing and health workforce were  
451 the top two bottlenecks for scale-up of maternal-newborn intervention packages [21].  
452 Furthermore, in LMICs, infrastructure and basic amenities remain the most significant  
453 contextual obstacles to successfully utilizing and benefiting from interventions and similar  
454 networks [22]. These issues resonated through our study, showing that, despite some  
455 characteristics of the network helping to problem solve, trying to improve quality of care in  
456 the absence of an adequate health workforce, infrastructure, country-led finance, or  
457 distributed leadership was challenging.

458 In LMICs the foundation of a health system can easily be shaken because of the little reserve  
459 capacity to respond to a shock. The Covid 19 pandemic was a perfect example of this. While  
460 contextual adaptation and accommodation of interventions in an existing environment could  
461 be a foundation for a sustainable and resilient system, repurposing of health professionals

462 and health facilities during the pandemic has clearly negatively affected maternal and  
463 newborn care [23]. Likewise, contextual factors like political instability, as well as natural  
464 calamities such as droughts and floods, may impair on-going health efforts by disrupting usual  
465 service delivery [24]. In the case of QCN, such challenges directly linked to limiting the  
466 possibility of conducting learning sessions, reducing the pool of available staff, restricting  
467 transportation and supply chains, and reducing service provision.

468

## 469 **Strengths and limitations of this study**

470 Research methods that were harmonised between time and place across four diverse  
471 countries represented a unique opportunity for learning. However, implementation of the  
472 research methods was driven by country specific local realities meaning that the learning was  
473 not uniform between settings. In addition, the framework used for this paper has a limitation  
474 in not focusing on what many have called the invisible software of health systems and the  
475 network such as intra and inter-professional relationships, local 'practical norms' and other  
476 aspects of local facility culture or local cultural issues. Nonetheless, the consistency of themes  
477 emerging across these four different contexts suggested a high level of external validity and  
478 potential of extrapolation to inform future health networks.

479

## 480 **Conclusion and recommendation**

481 Implementing multicounty networks in different settings necessitates inputs and  
482 coordination at multiple health system levels. To achieve the network's objectives, it is  
483 necessary to have an adequate amount of health system financing, strong political leadership,  
484 and coordination, as well as dedication to streamlined data systems, which requires

485 organizational structures filled with motivated and well trained individuals who benefit from  
486 local leaders and have a positive data use culture. Within countries, the intended network  
487 goal to reduce maternal and newborn mortality had the best opportunity to be realized  
488 through coordinated efforts of subnational and national stakeholders. In the selected four  
489 network countries, the characteristics of QCN helped to address issues related to staff,  
490 leadership and data use. Capacity challenges encountered at individual, organisational and  
491 system levels hampered the initiative's ability to succeed as intended. Nonetheless, sufficient  
492 gains have been made to warrant investing the time, effort and resources needed to sustain  
493 the Network rather than introducing other new programmes.

494

## 495 **Acknowledgment**

496 We would like to forward our gratitude to the national and local level network  
497 implementation stakeholders and members including the QCN technical working group  
498 members in Bangladesh, Ethiopia, Malawi, and Uganda for their relentless support during the  
499 data collection process. We thank all respondents and stakeholders for their time and  
500 contributions toward making this work possible. The QCN Evaluation Group is: Mithun Sarker,  
501 Abdul Kuddus, Kishwar Azad [BADAS-PCP Bangladesh], Albert Dube, Gladson Monjeza, Rachel  
502 Magaletta, Zabvuta Moffolo, Charles Makwenda [Parent and Child Health Initiative, Malawi],  
503 Mary Kinney, Fidele Mukinda [independent researchers, South Africa], Yusra Shavar, Will  
504 Payne, Jeremy Shiffman [Johns Hopkins University, USA], Agnes Kyamulabi, Hilda Namakula,  
505 [Makerere University, Uganda] Asebe Amenu, Theodros Getachew, Geremew Gonfa [Ethiopia  
506 Public Health Institute, Ethiopia].

507

## 508 **References**

- 509 1. Nyongesa P, Yego F, Tonui P, Itsura P, Sorre B, Omar EO. Strengthening Weak  
510 Healthcare Systems for Maternal and Neonatal Care in Low and Middle Income  
511 Countries: The Missing Link. *Adv Sex Med.* 2022;12(01):18–33.
- 512 2. WHO. Delivering quality health services [Internet]. World Health Organization, World  
513 Bank Group, OECD. 2018. 1–100 p.
- 514 3. Levenstein A. Successful leadership; Country Actions for Maternal, Newborn and Child  
515 Health. *Nurse Educ.* 2008;6(3):33.
- 516 4. WHO. Quality of Care for Maternal and Newborn Health : a Monitoring Framework for  
517 Network Countries. Who [Internet]. 2019;(February).
- 518 5. WHO. Standards for improving quality of maternal and newborn care in health  
519 facilities. Who. 2016;2021:84.
- 520 6. Chambers V, Booth D. Delivering maternal health. *Overseas Dev Inst.* 2012;(May).
- 521 7. Berwick D, Snair M, Nishtar S. Crossing the Global Health Care Quality Chasm. *JAMA.*  
522 2018; 320(13):1317.
- 523 8. Edwards N, Barker P. The Importance of Context in Implementation Research. *JAIDS*  
524 *Journal of Acquired Immune Deficiency Syndromes.* 2014;67(Supplement 2):S157-  
525 S162.
- 526 9. Msiska G, Simwaka A, Munkhondya B, Kabuluzi E, Munkhondya TE. Factors Militating  
527 against the Delivery of Compassionate Care: A Malawian Perspective. *Open J Nurs.*  
528 2018;08(12):889–904.
- 529 10. Spicer N, Bhattacharya D, Dimka R, Fanta F, Mangham-Jefferies L, Schellenberg J, et al.  
530 ‘Scaling-up is a craft not a science’: Catalysing scale-up of health innovations in



- 531 Ethiopia, India and Nigeria. Soc Sci Med [Internet]. 2014;121:30–8.
- 532 11. Quality, equity, dignity: the network to improve quality of care for maternal, newborn  
533 and child health – strategic objectives [Internet]. Who.int. 2022 [cited 23 May 2022].  
534 Available from: <https://www.who.int/publications-detail-redirect/9789241513951>
- 535 12. Wu X, Ramesh M, Howlett M. Policy capacity: A conceptual framework for understanding  
536 policy competences and capabilities. Policy and Society. 2015; 34(3-4):165-171.
- 537 13. Djellouli N, Mann S, Nambiar B, Meireles P, Miranda D, Barros H et al. Improving  
538 postpartum care delivery and uptake by implementing context-specific interventions  
539 in four countries in Africa: a realist evaluation of the Missed Opportunities in Maternal  
540 and Infant Health (MOMI) project. BMJ Global Health. 2017; 2(4): e000408.
- 541 14. WHO, UNICEF, UNFPA, WBG, UN. World Health Organization. (2019). Trends in maternal  
542 mortality 2000 to 2017: estimates by WHO, UNICEF, UNFPA, World Bank Group and  
543 the United Nations Population Division. World Health Organization. Available from:  
544 <https://apps.who.int/iris/handle/10665>. 2017. 119 p.
- 545 15. Mwandra K. et.al. (2022) Do networks facilitate innovation, learning and sharing? Case  
546 studies from the Quality of Care Network (QCN) evaluation, One of the QCN series  
547 papers
- 548 16. Sfantou D, Laliotis A, Patelarou A, Sifaki- Pistolla D, Matalliotakis M, Patelarou E.  
549 Importance of Leadership Style towards Quality of Care Measures in Healthcare  
550 Settings: A Systematic Review. 2022.
- 551 17. Mathole T, Lembani M, Jackson D, Zarowsky C, Bijlmakers L, Sanders D. Leadership and  
552 the functioning of maternal health services in two rural district hospitals in South  
553 Africa. Health Policy and Planning. 2018;33(suppl\_2): ii5-ii15.
- 554 18. Belrhiti, Z., Van Damme, W., Belalia, A. and Marchal, B., 2020. The effect of leadership on

- 555 public service motivation: a multiple embedded case study in Morocco. *BMJ Open*,  
556 10(1), p.e033010.
- 557 19. Akter K. Influences on policy-formulation, decision-making, organisation and  
558 management for maternal, newborn and child health in Bangladesh, Ethiopia, Malawi  
559 and Uganda: the roles and legitimacy of a multi-country network, One of the QCN  
560 series papers
- 561 20. Hanson K. Introducing The Lancet Global Health Commission on financing primary health  
562 care: putting people at the centre. *The Lancet Global Health*. 2022;10(1):e20-e21.
- 563 21. Sharma G, Mathai M, Dickson K, Weeks A, Hofmeyr G, Lavender T et al. Quality care during  
564 labour and birth: a multi-country analysis of health system bottlenecks and potential  
565 solutions. *BMC Pregnancy and Childbirth*. 2015;15(S2).
- 566 22. Maina M, Tosas-Auguet O, McKnight J, Zosi M, Kimemia G, Mwaniki P et al. Evaluating  
567 the foundations that help avert antimicrobial resistance: Performance of essential  
568 water sanitation and hygiene functions in hospitals and requirements for action in  
569 Kenya. *PLOS ONE*. 2019;14(10): e0222922.
- 570 23. Ahmed T, Rahman A, Amole T, Galadanci H, Matjila M, Soma-Pillay P et al. The effect of  
571 COVID-19 on maternal newborn and child health (MNCH) services in Bangladesh,  
572 Nigeria and South Africa: call for a contextualised pandemic response in LMICs.  
573 *International Journal for Equity in Health*. 2021;20(1).
- 574 24. Baten A, Wallemacq P, van Loenhout JAF, Guha-Sapir D. Impact of Recurrent Floods on  
575 the Utilization of Maternal and Newborn Healthcare in Bangladesh. *Matern Child Heal*  
576 *J* 2020 246 [Internet]. 2020 Apr 13 [cited 2022 Feb 4];24(6):748–58.
- 577

## 578 **Supporting information**

579 **S1 Text. PLOS Global Public Health QCN Evaluation Collection 2-page summary.**

580 **S2 Text. PLOS Global Public Health QCN papers common methods section.**

**System  
circumstances**

- Policy alignment and partnercoordination
- The burden of parallel reporting systems
- Paying for quality healthcare
- Managing disruptive events

**Organizational  
circumstances**

- Inadequate staffing levels
- Finding strategies to continuously build staff skills
- Limited physical resources and processes in facilities

**Individual  
circumstances**

- Retaining trained & motivated staff
- Enhancing the culture of documentation and data use
- Importance of leaders to motivate individuals

**Multi-country network functionality**
